# Supplementary material
Source: PubMed Central journal article supplement (PMC5932238)

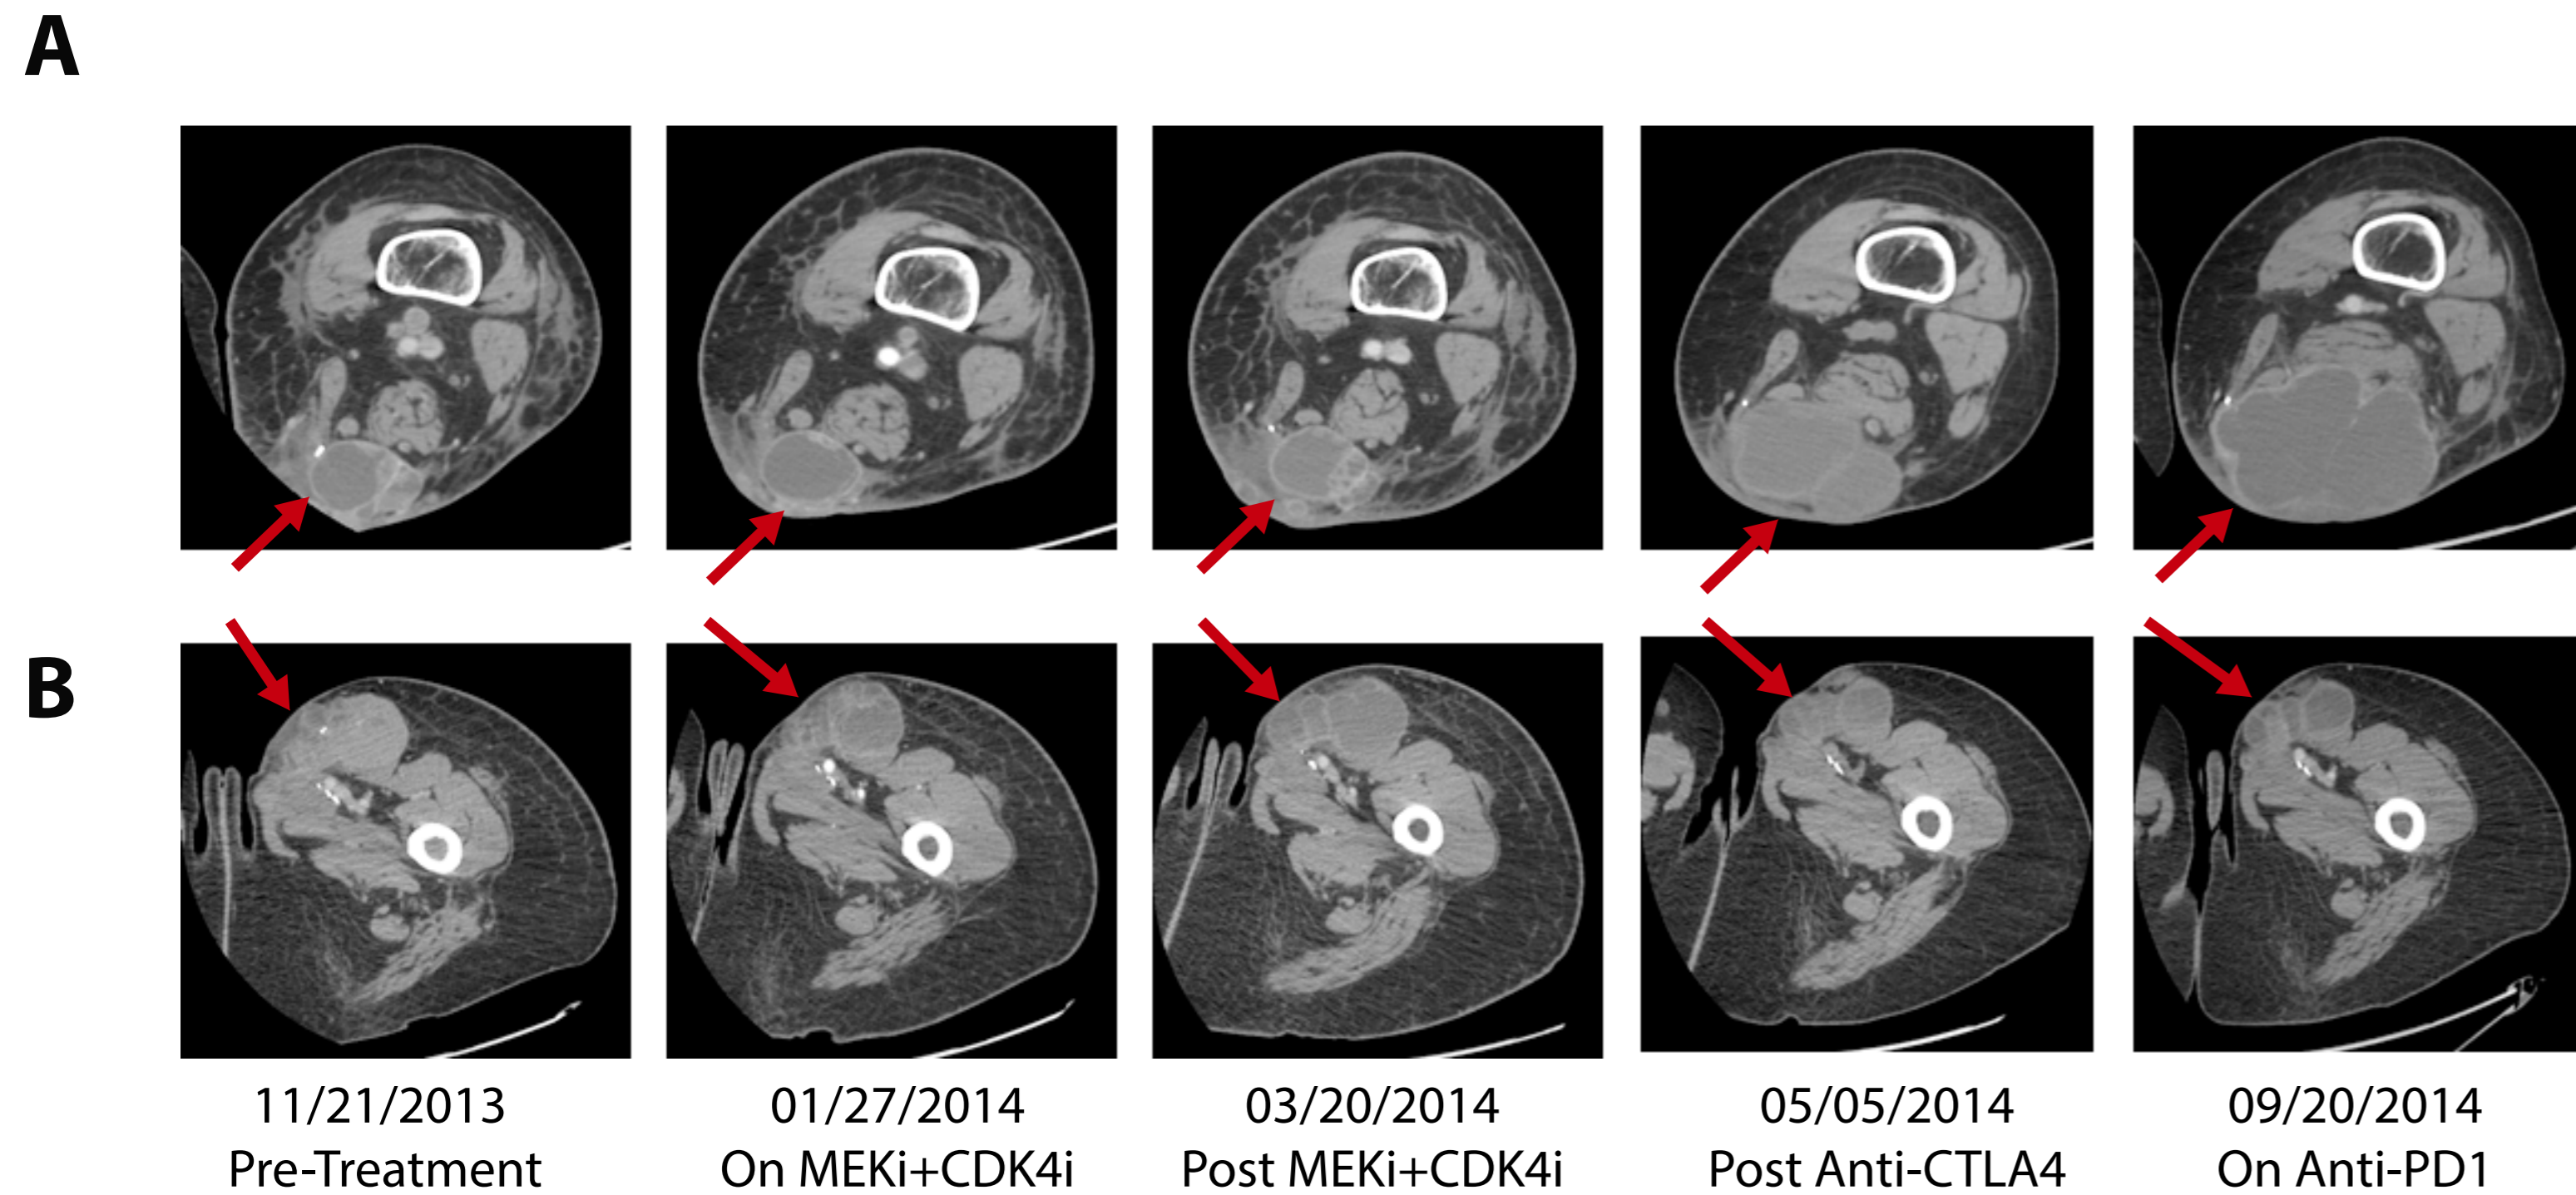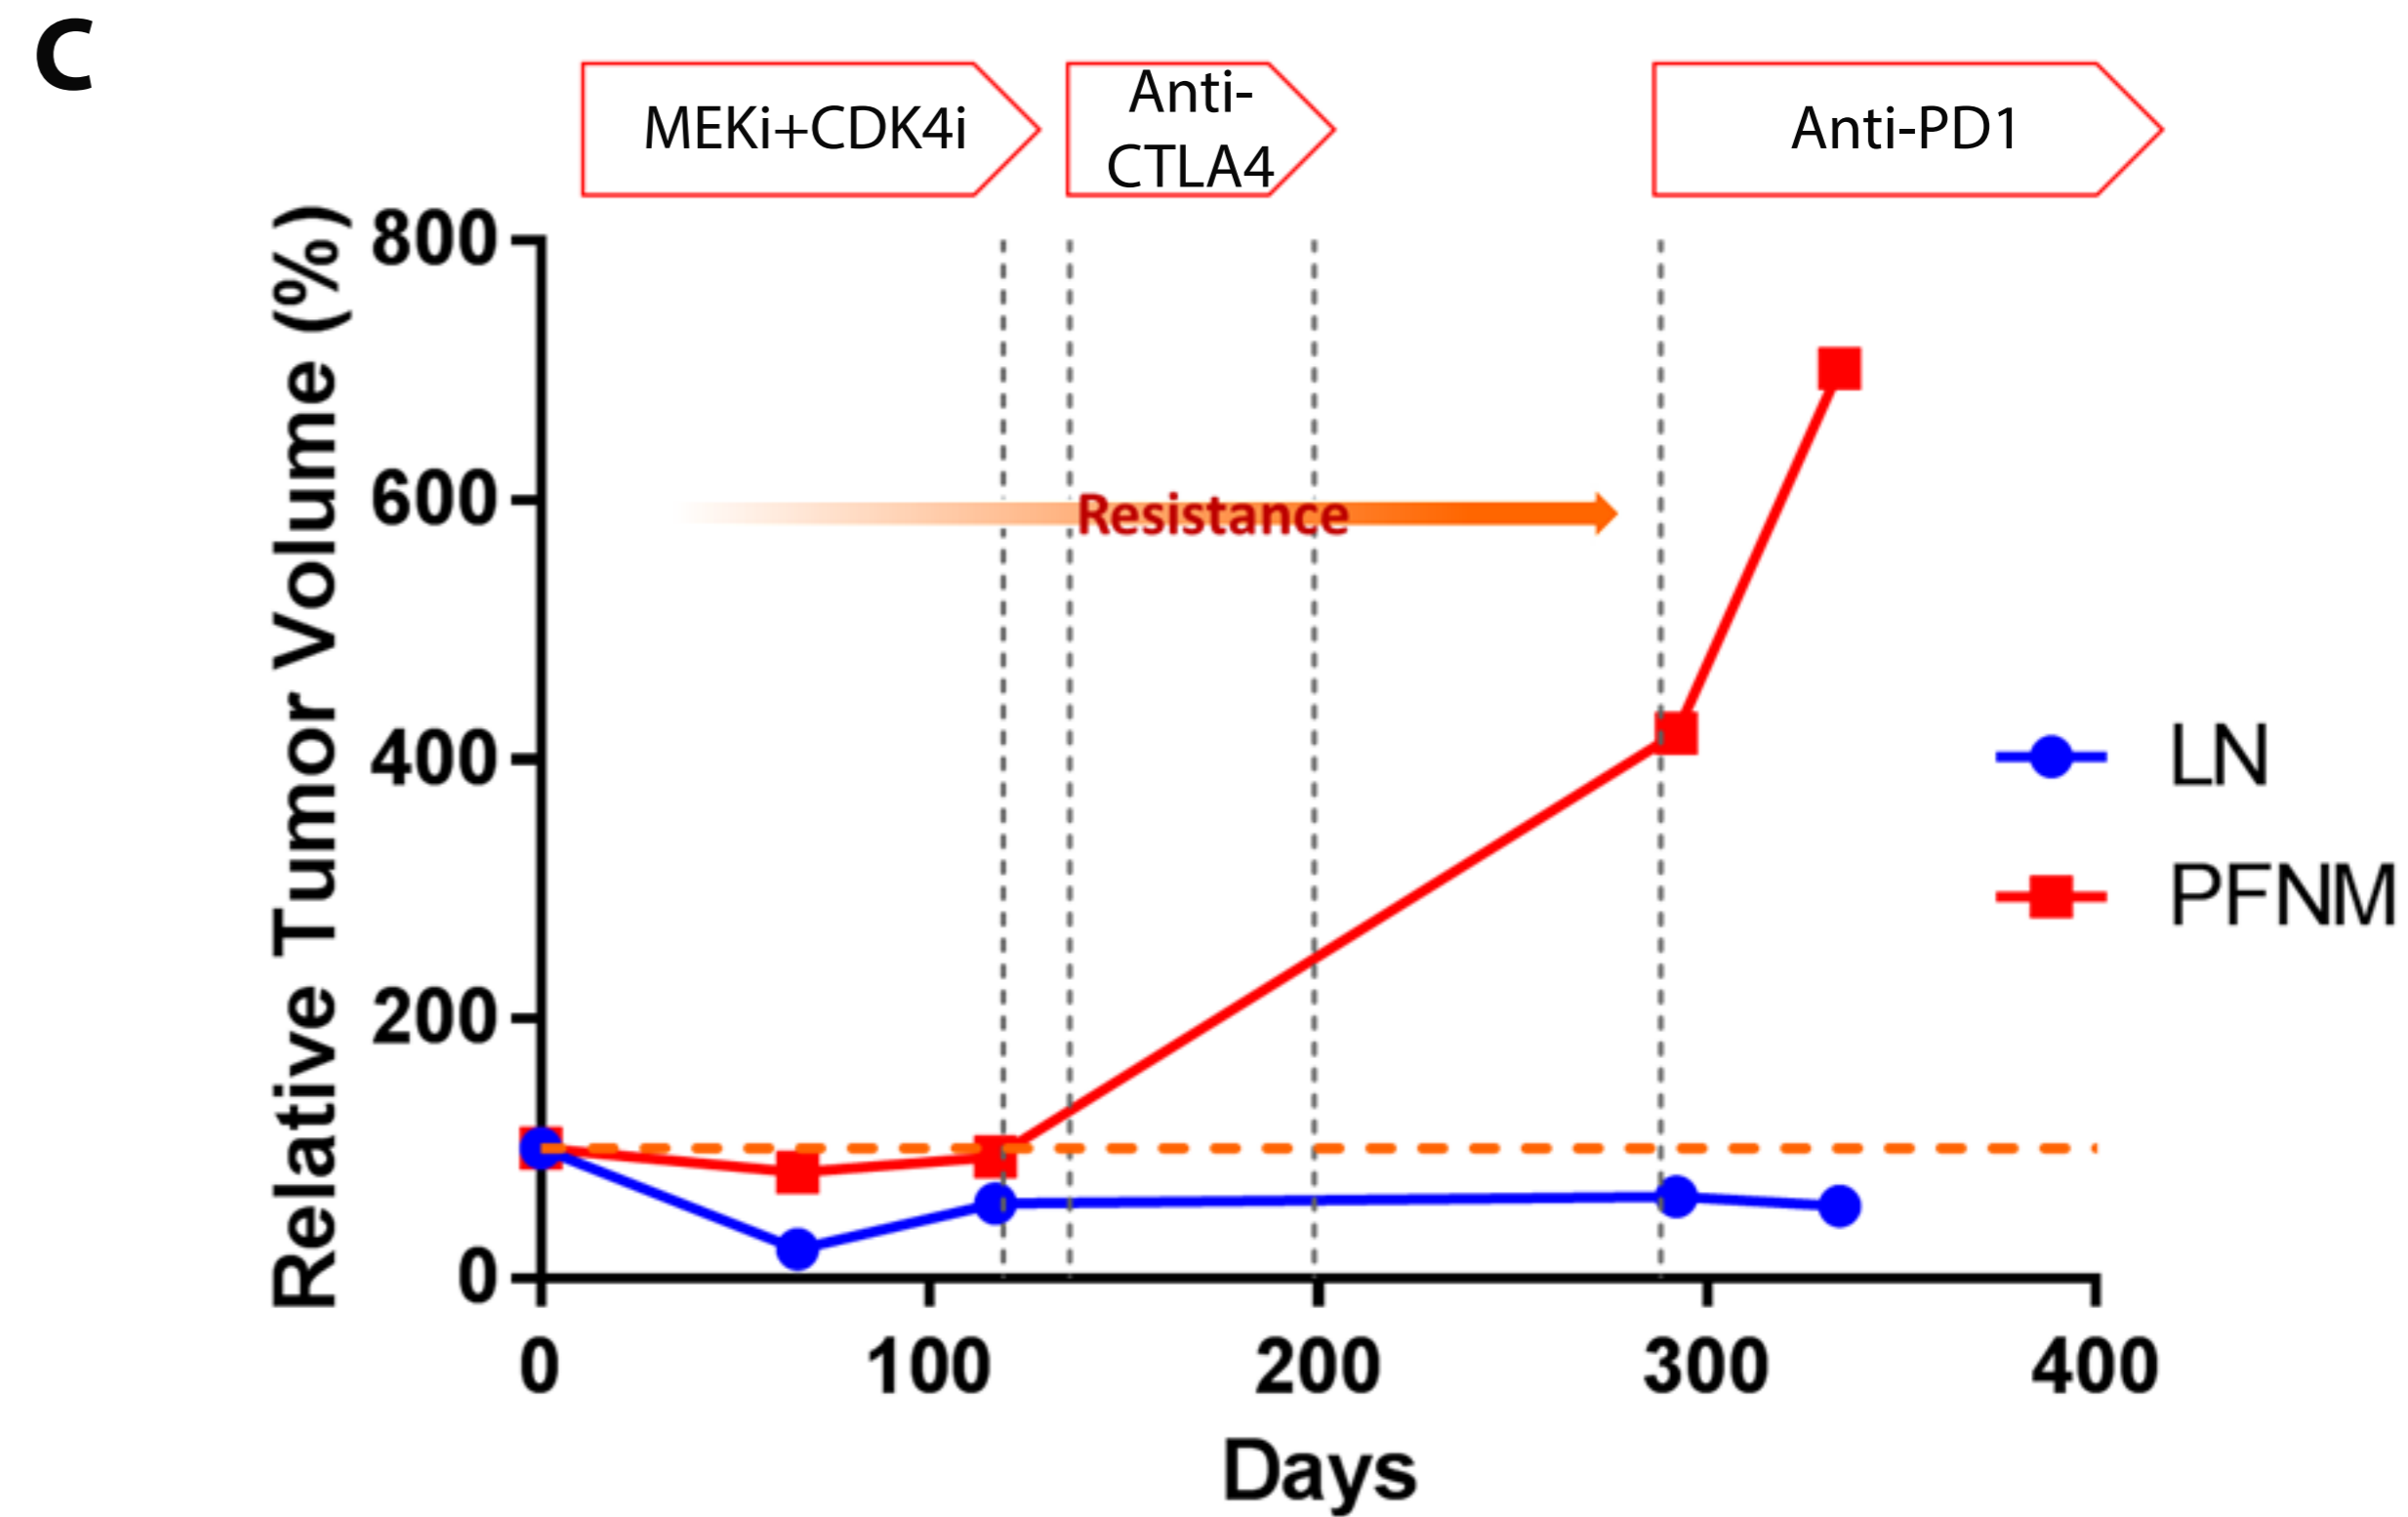

Ch3

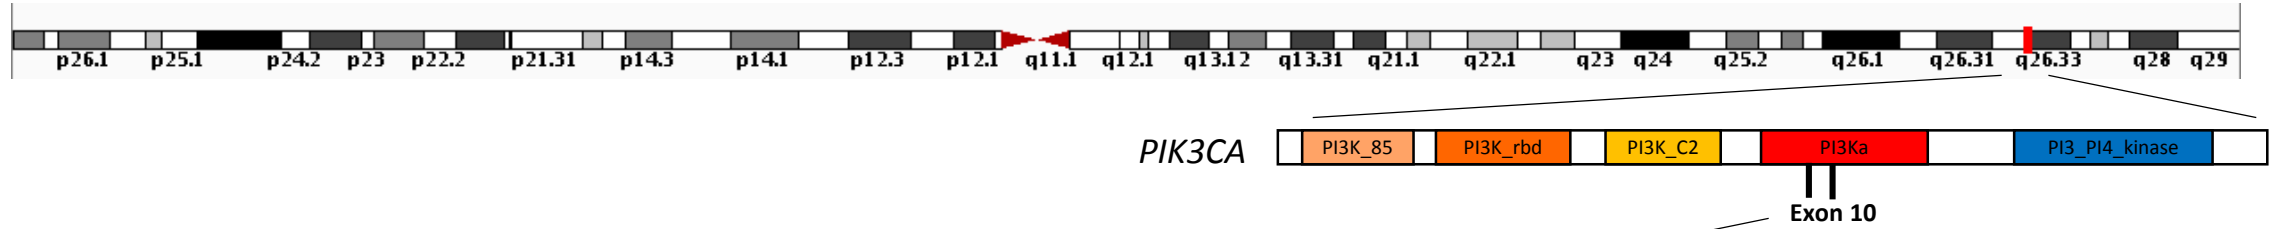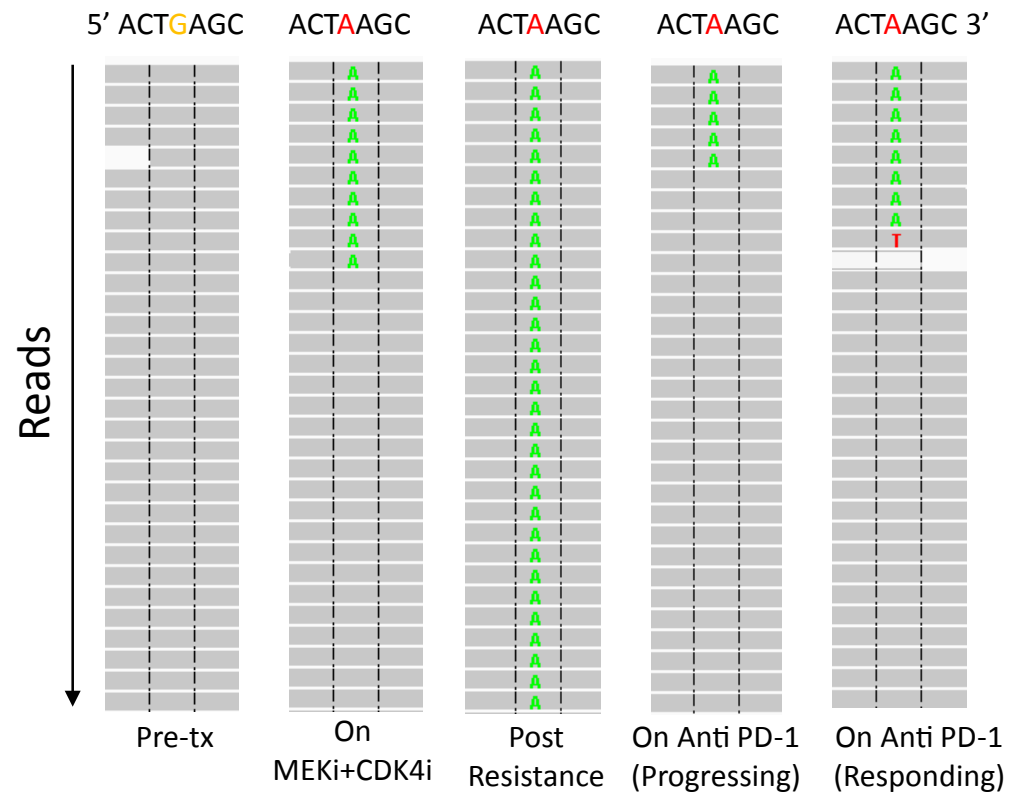

**Figure S3**

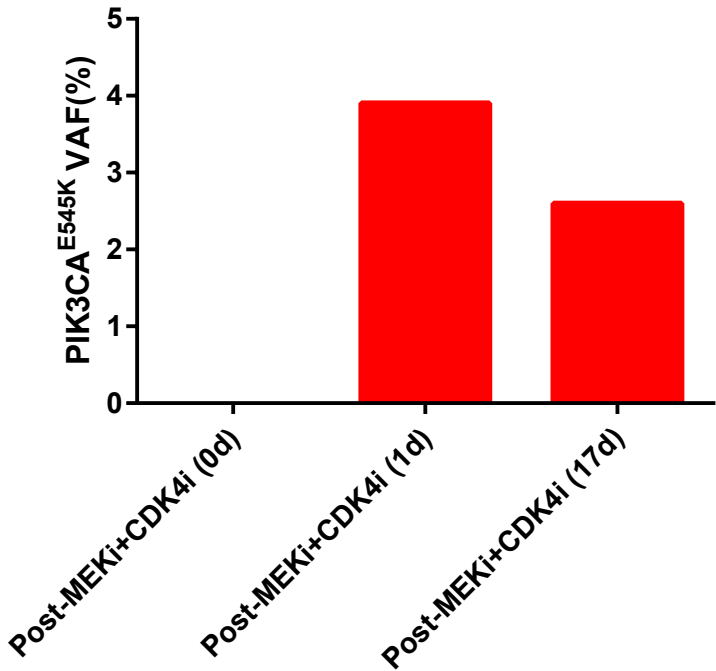

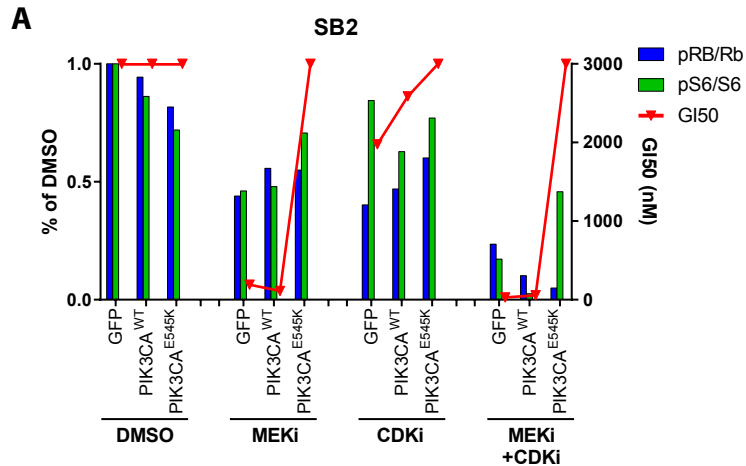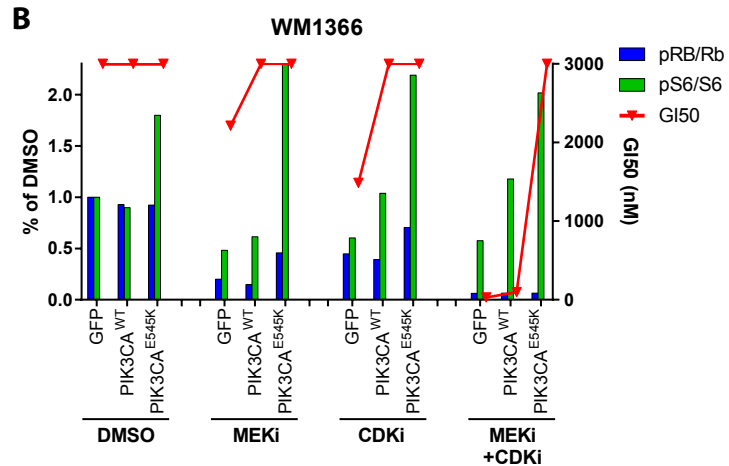

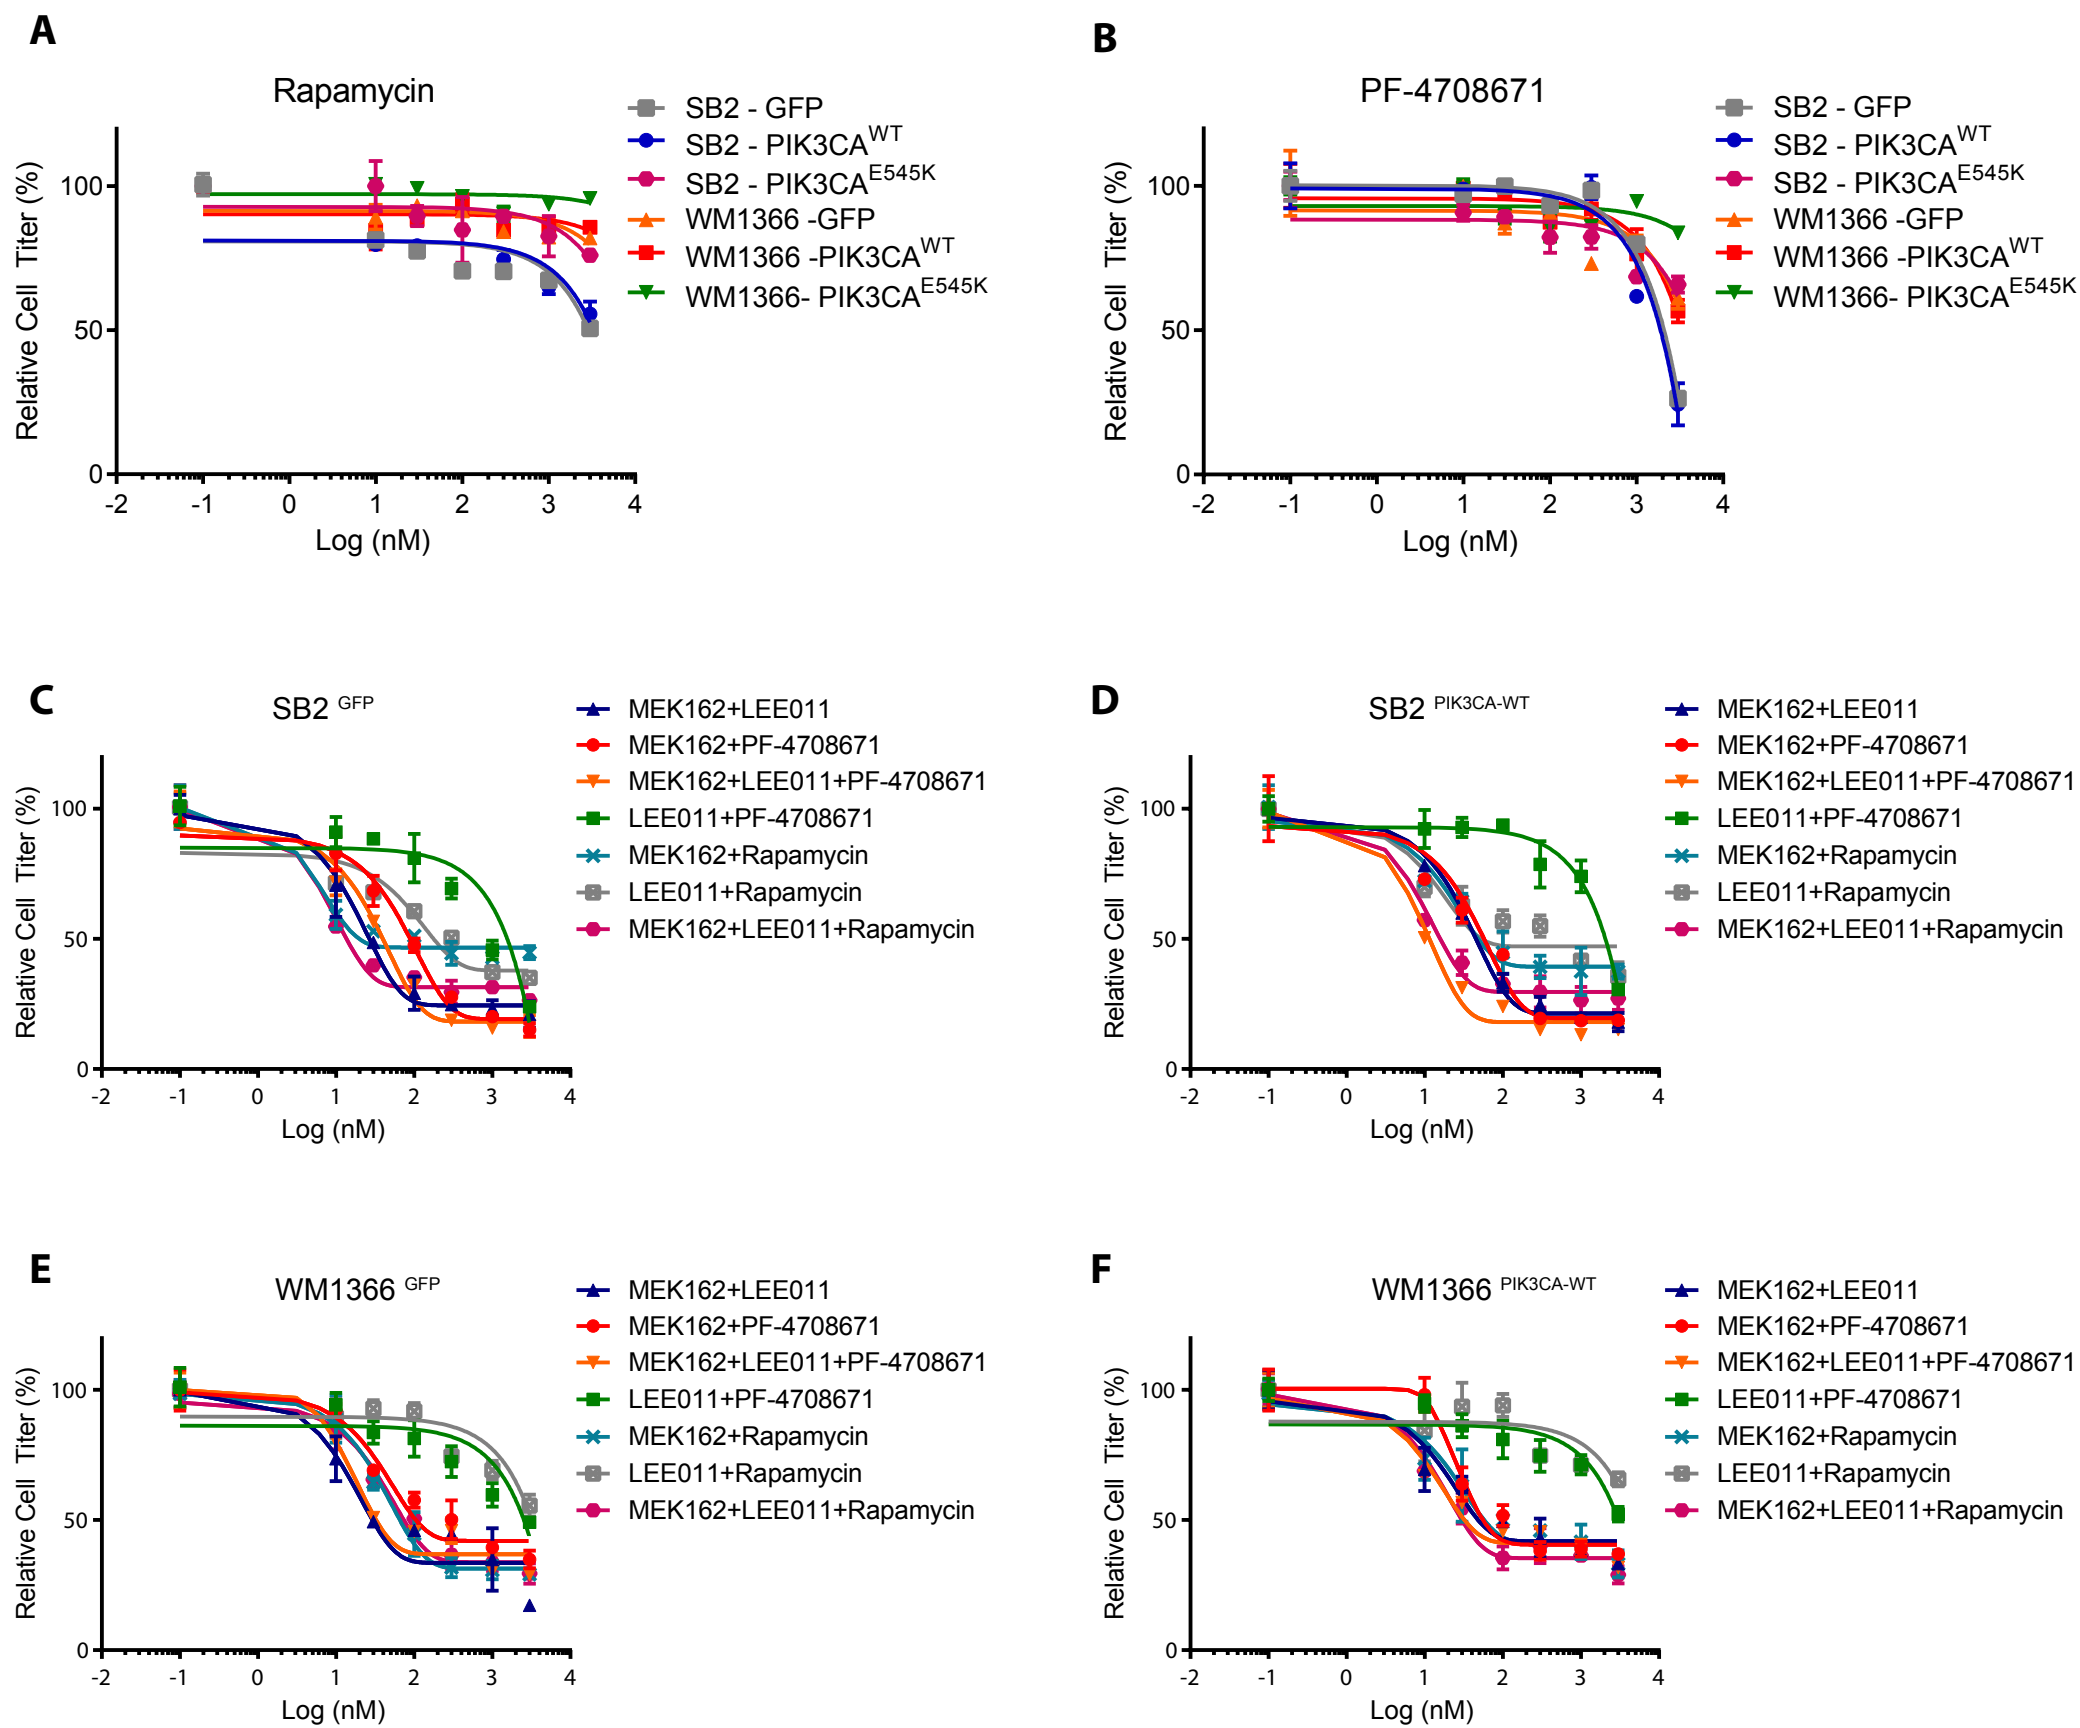

## hTert-immortalized Melanocytes

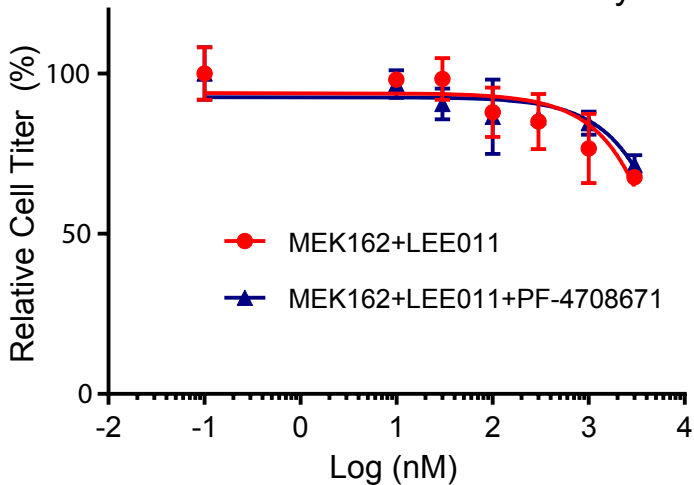

A

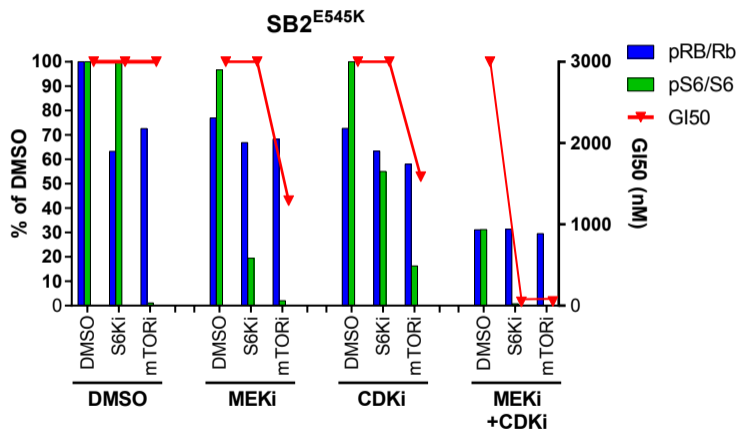

B

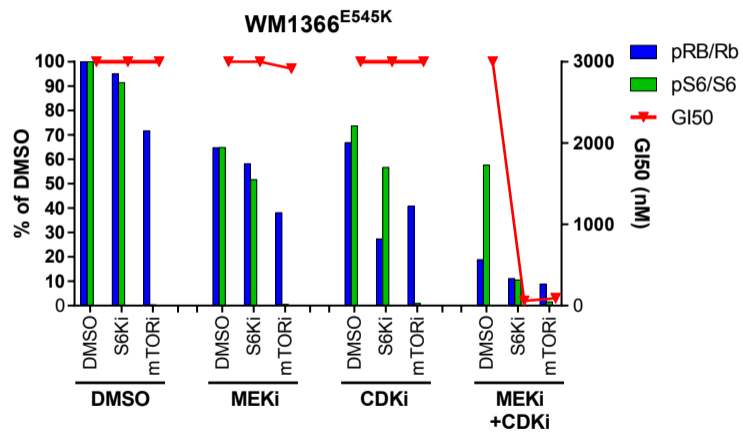

A

SB2<sup>E545K</sup>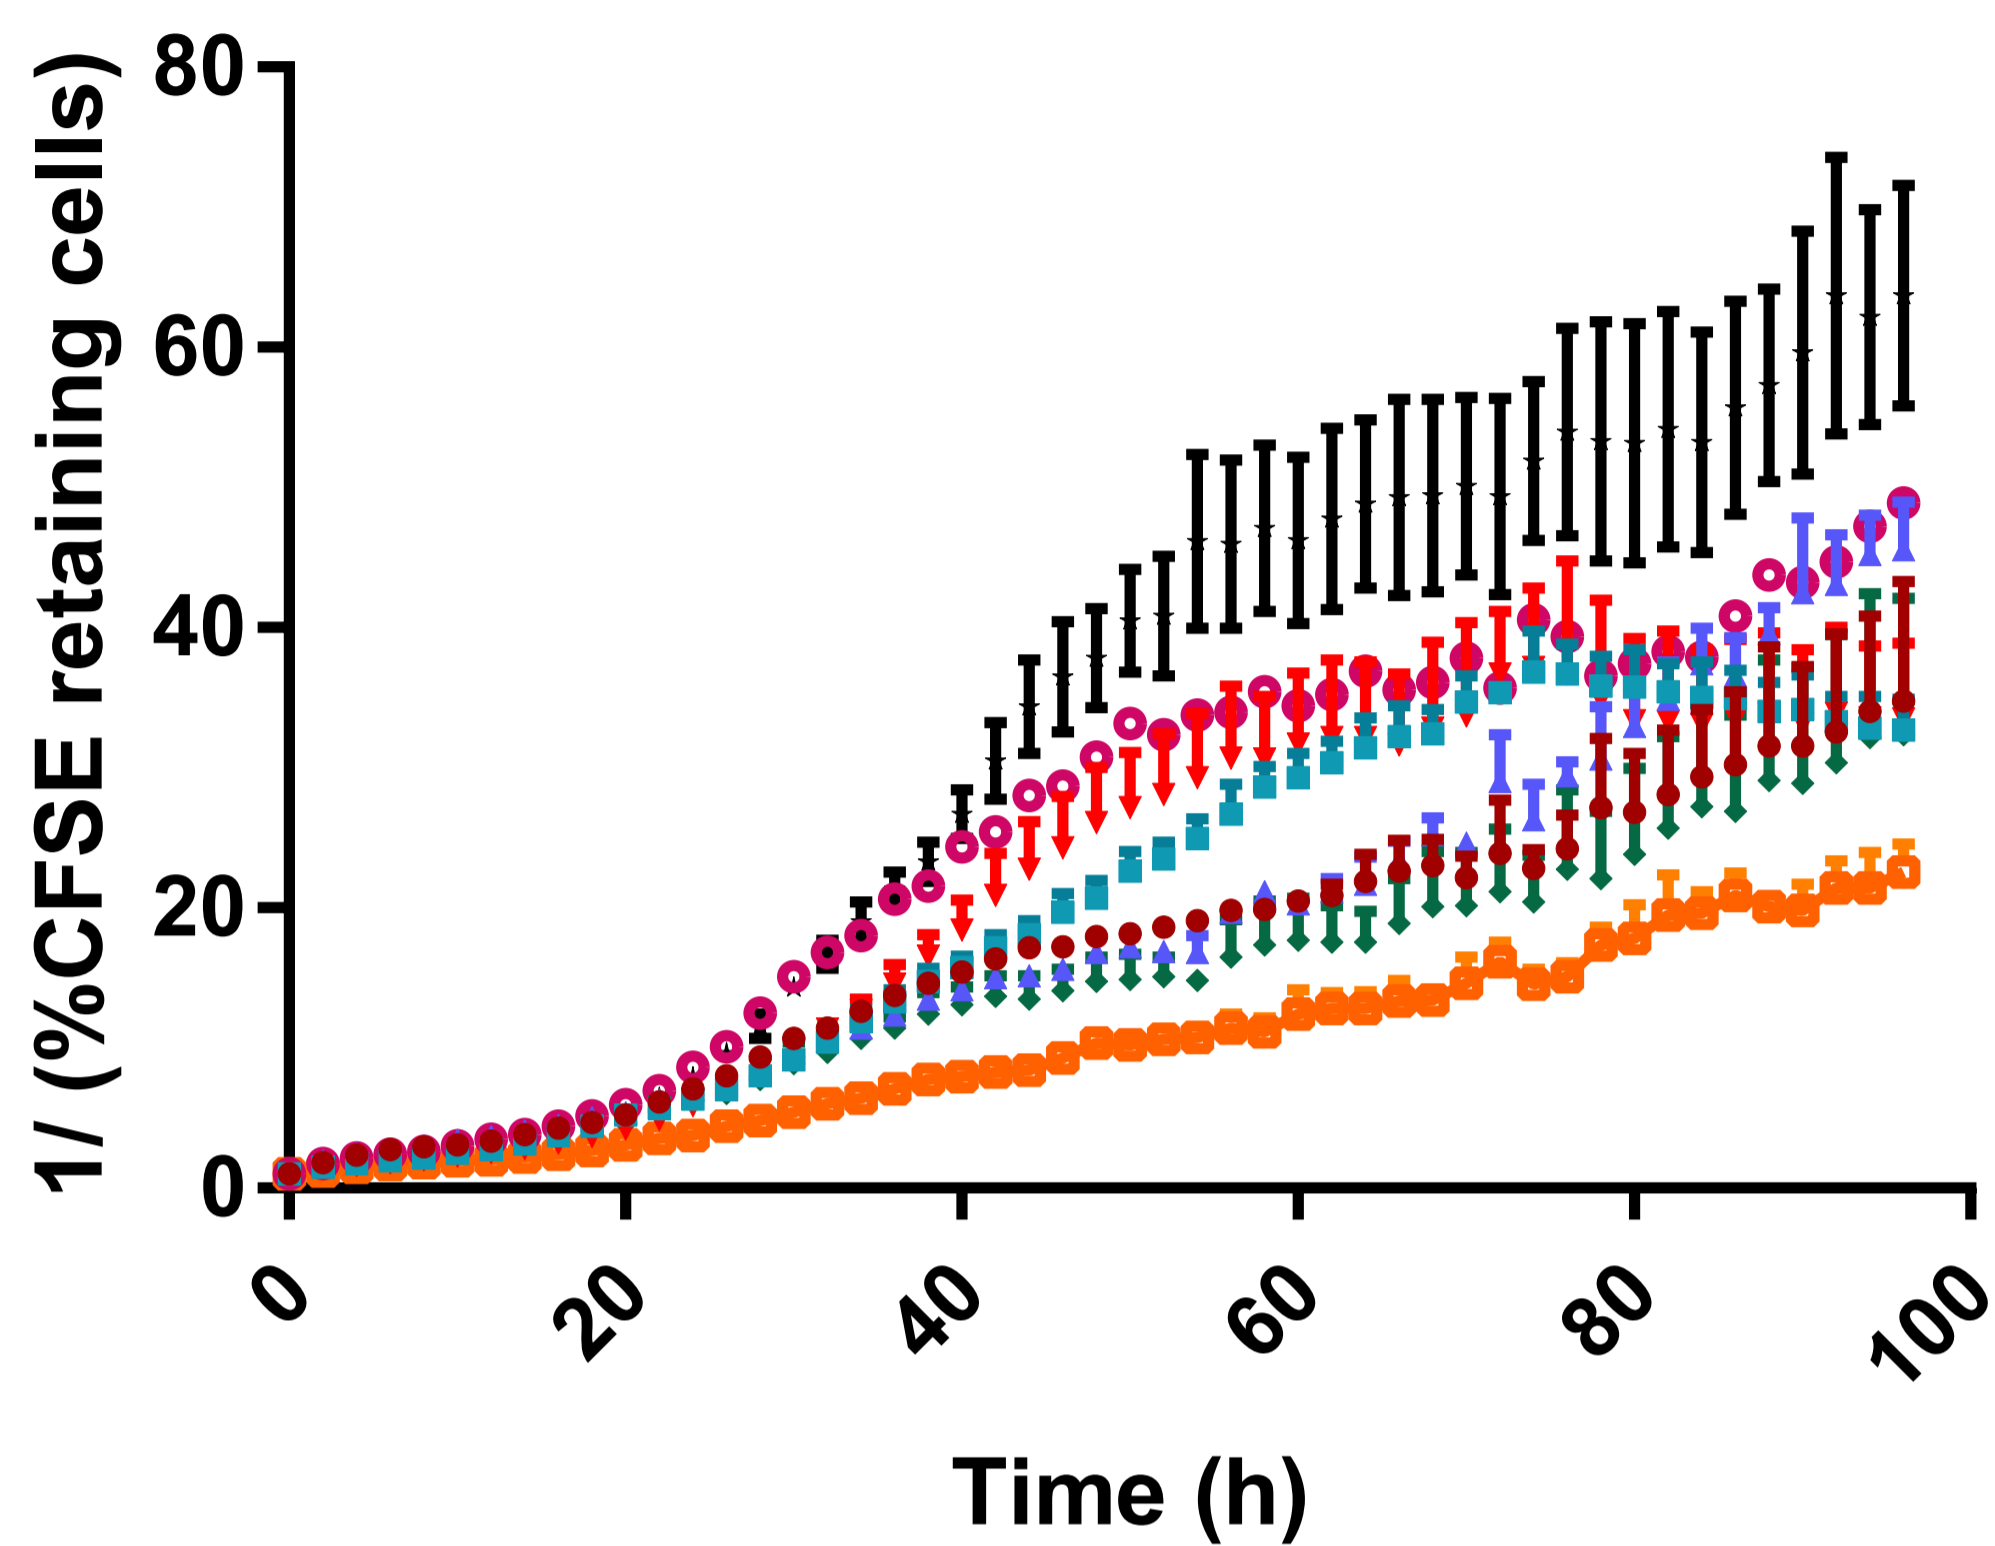

- \* DMSO 0.01%
- MEKi
- CDK4i
- ▲ MEKi+CDK4i
- ▼ S6K1i
- ◆ MEK+S6K1i
- CDK4i+S6K1i
- MEKi+CDK4i+S6K1i

B

WM1366<sup>E545K</sup>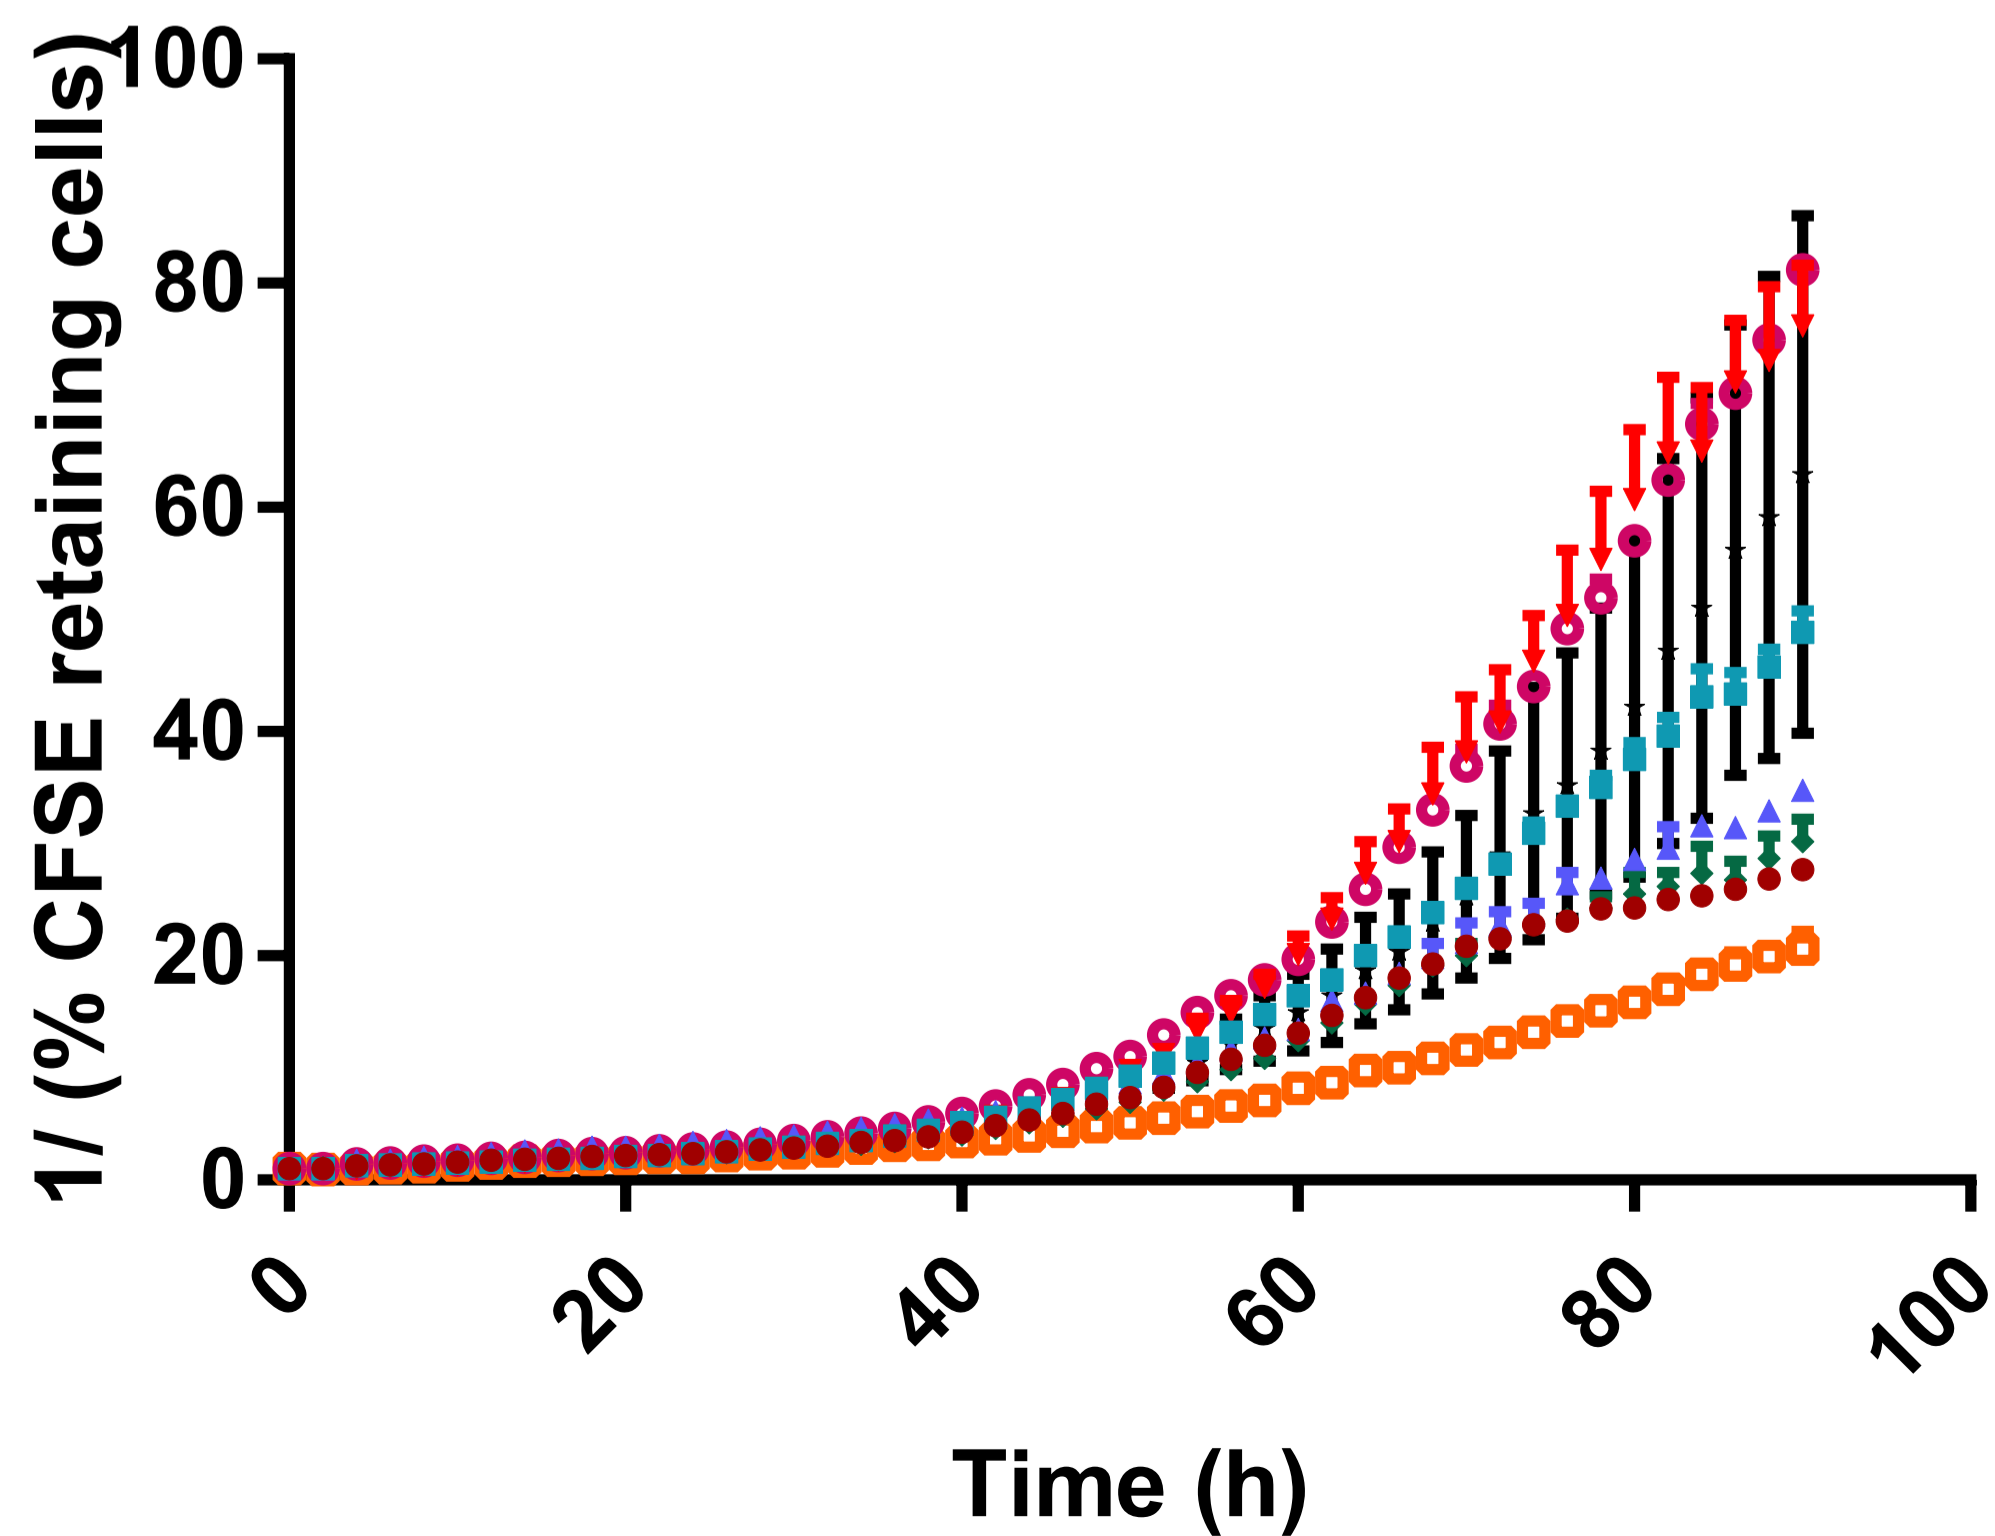

- \* DMSO 0.01%
- MEKi
- CDK4i
- ▲ MEKi+CDK4i
- ▼ S6K1i
- ◆ MEK+S6K1i
- CDK4i+S6K1i
- MEKi+CDK4i+S6K1i



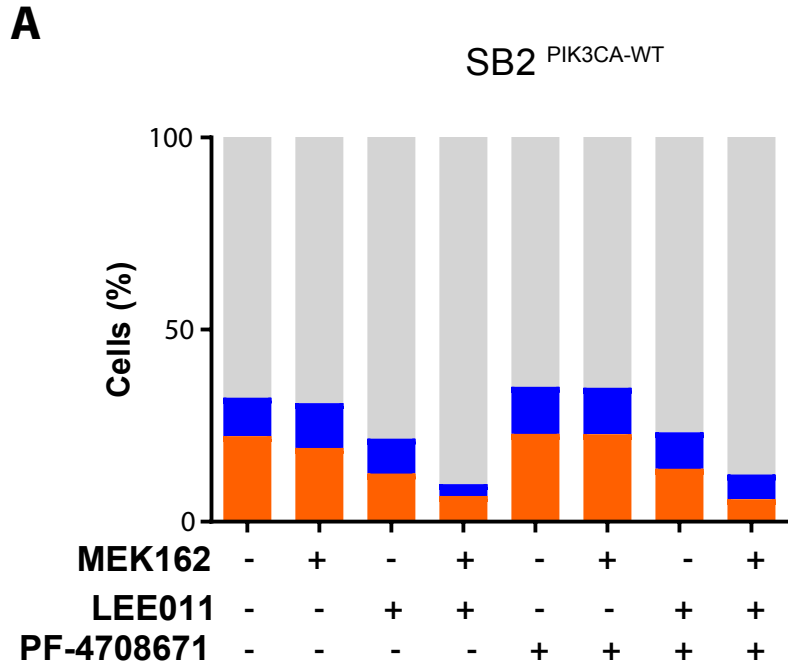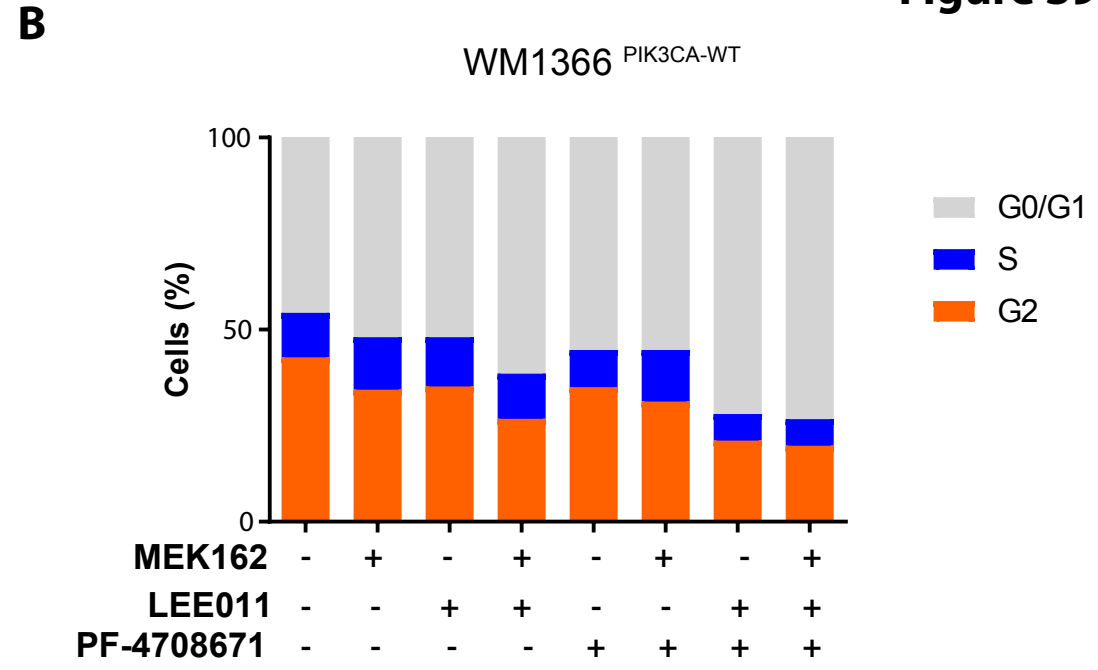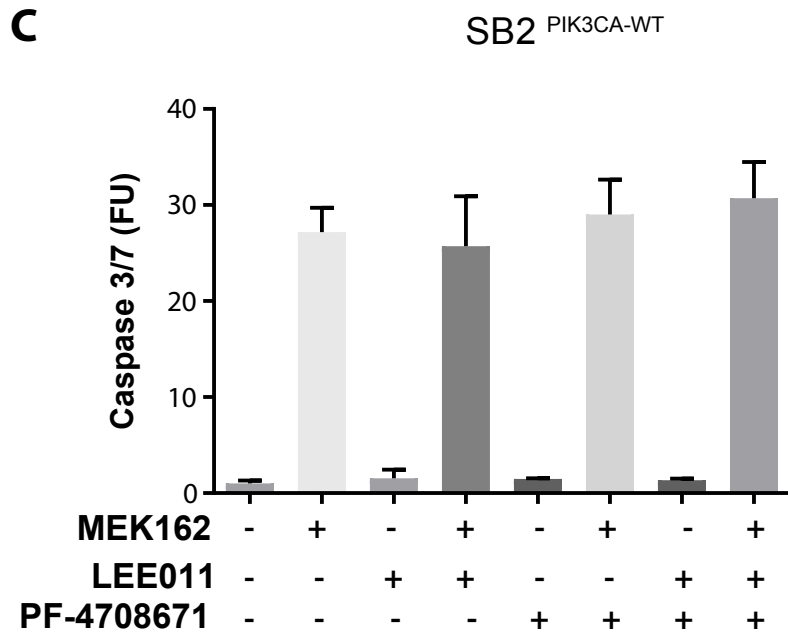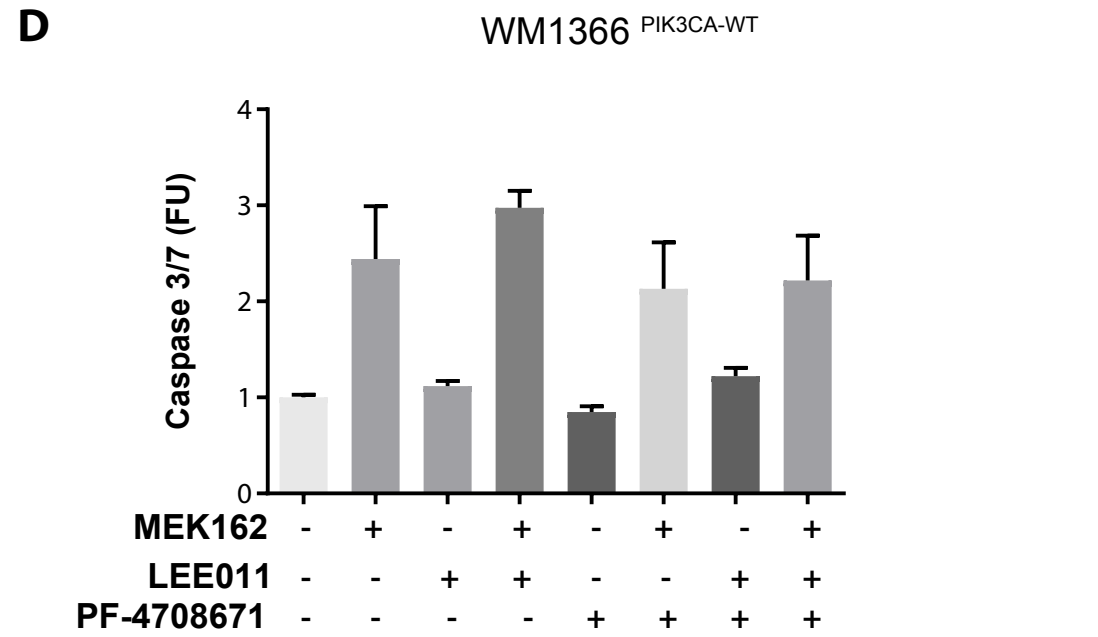

A

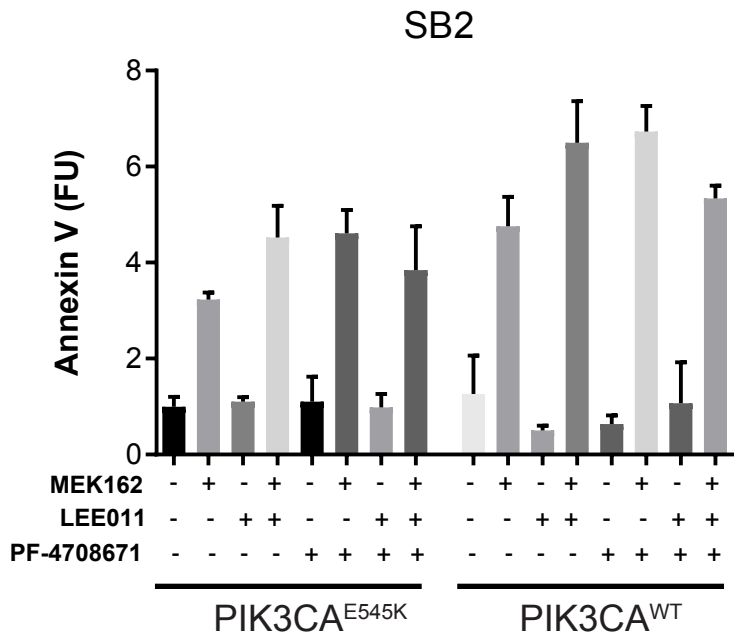

B

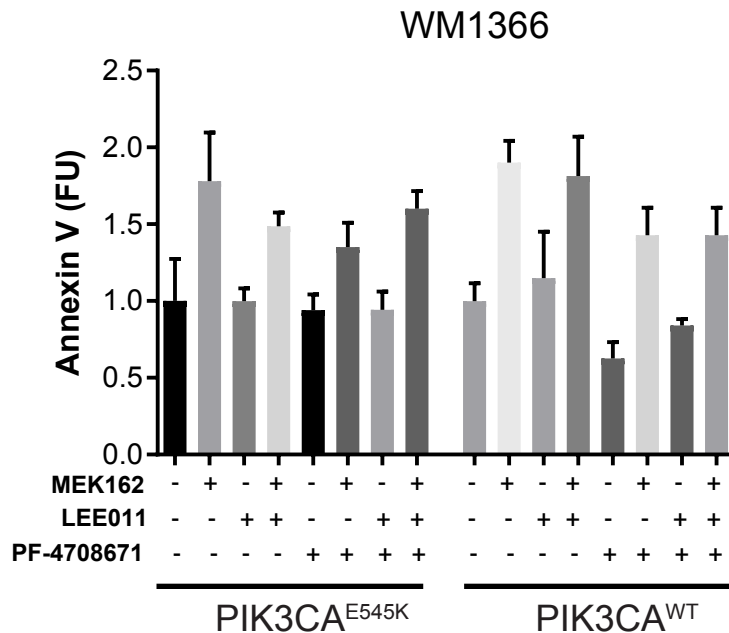

A

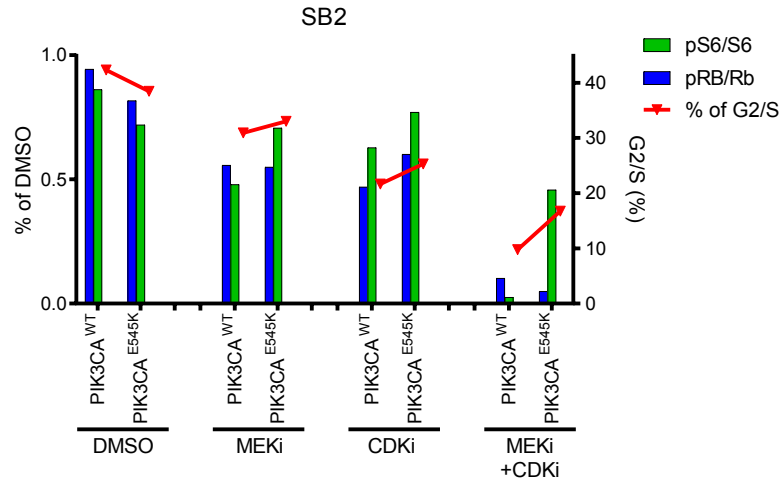

B

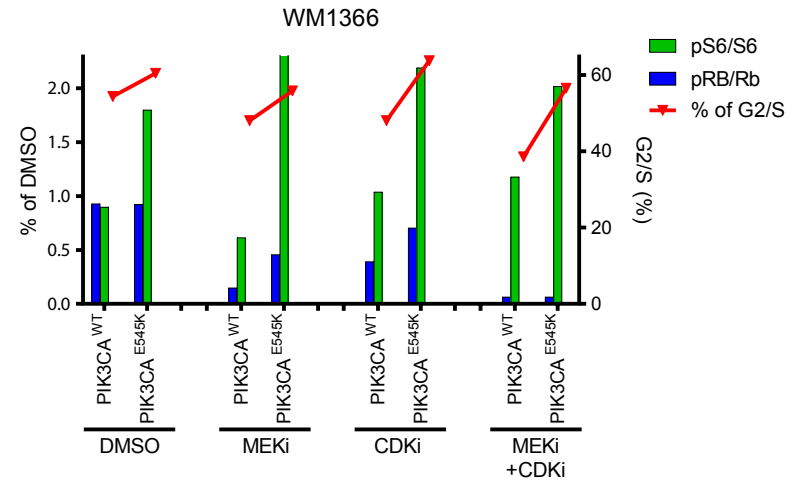

C

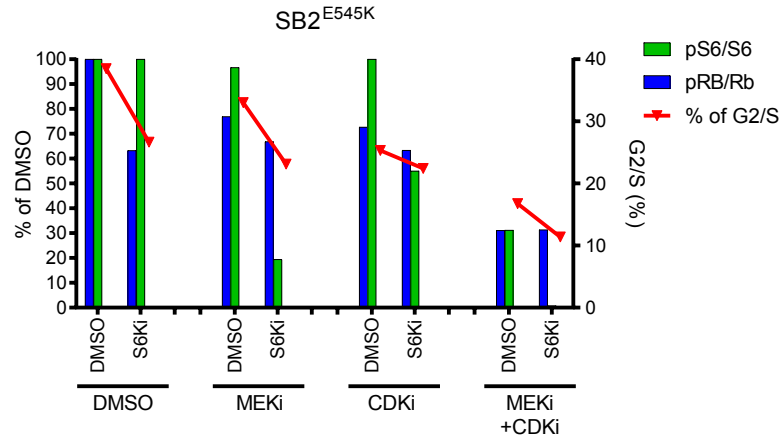

D

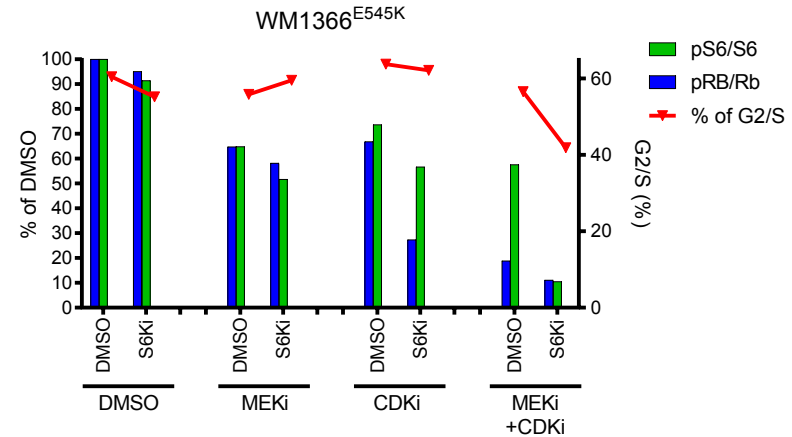

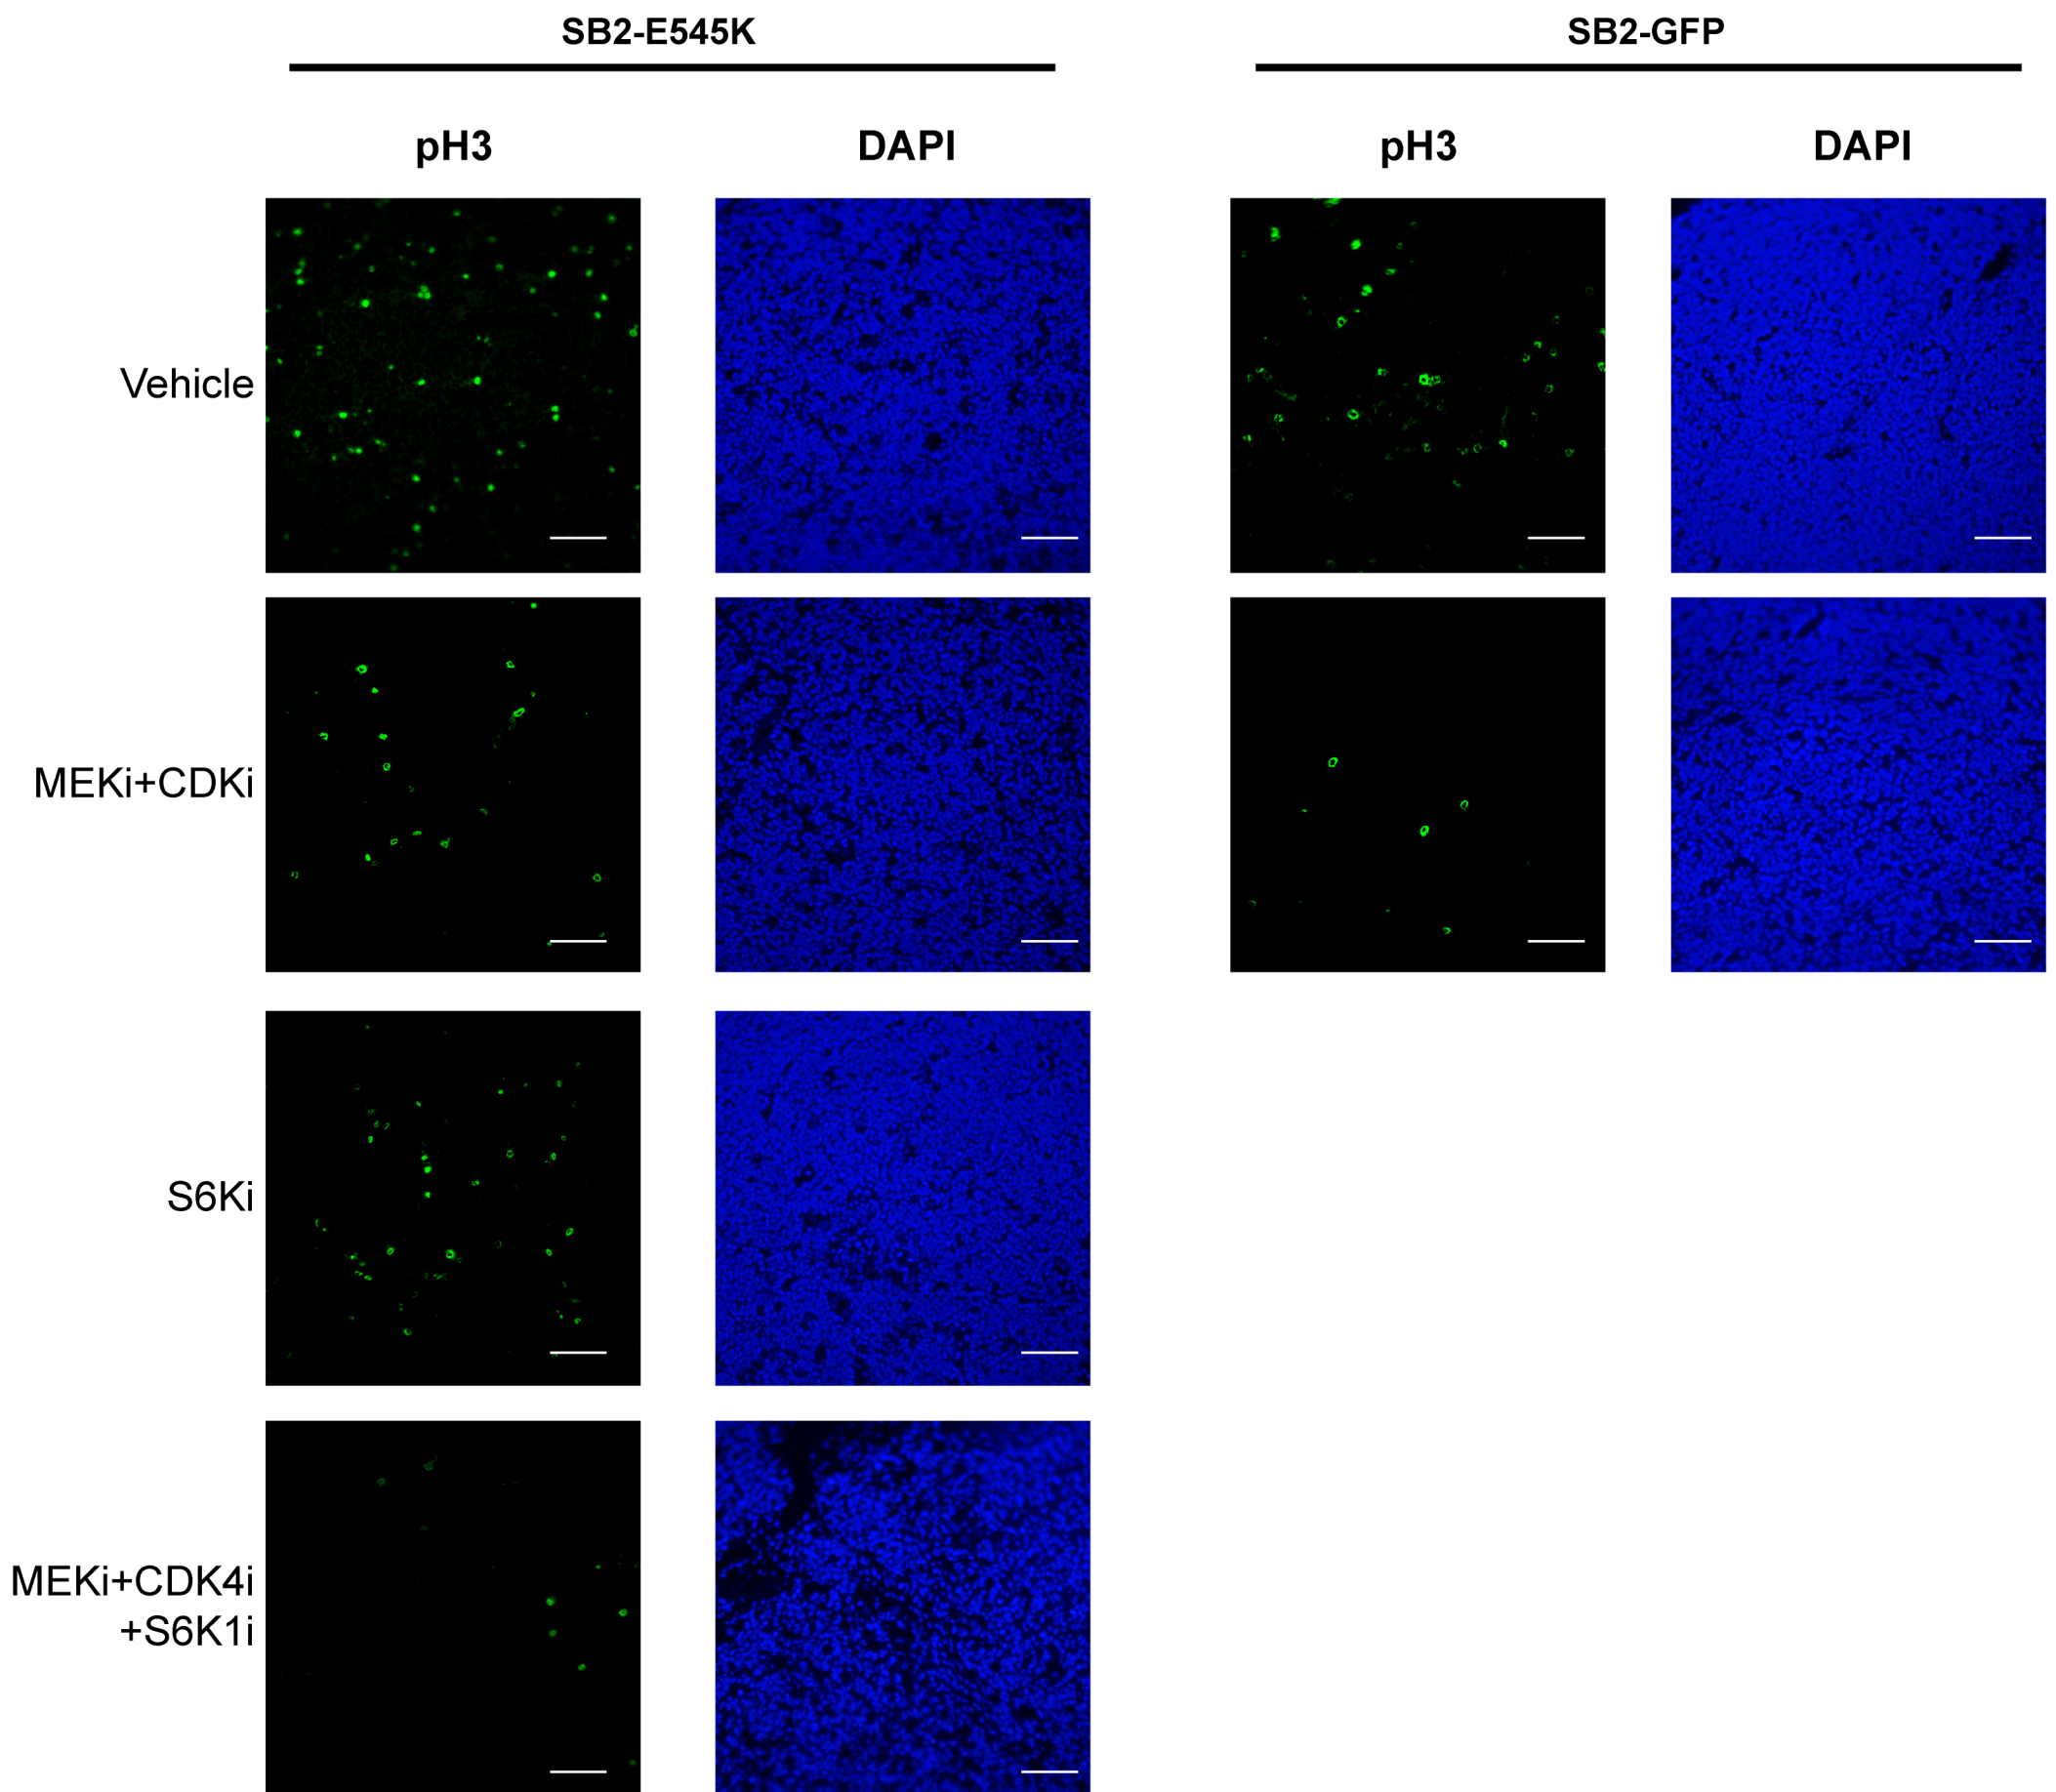

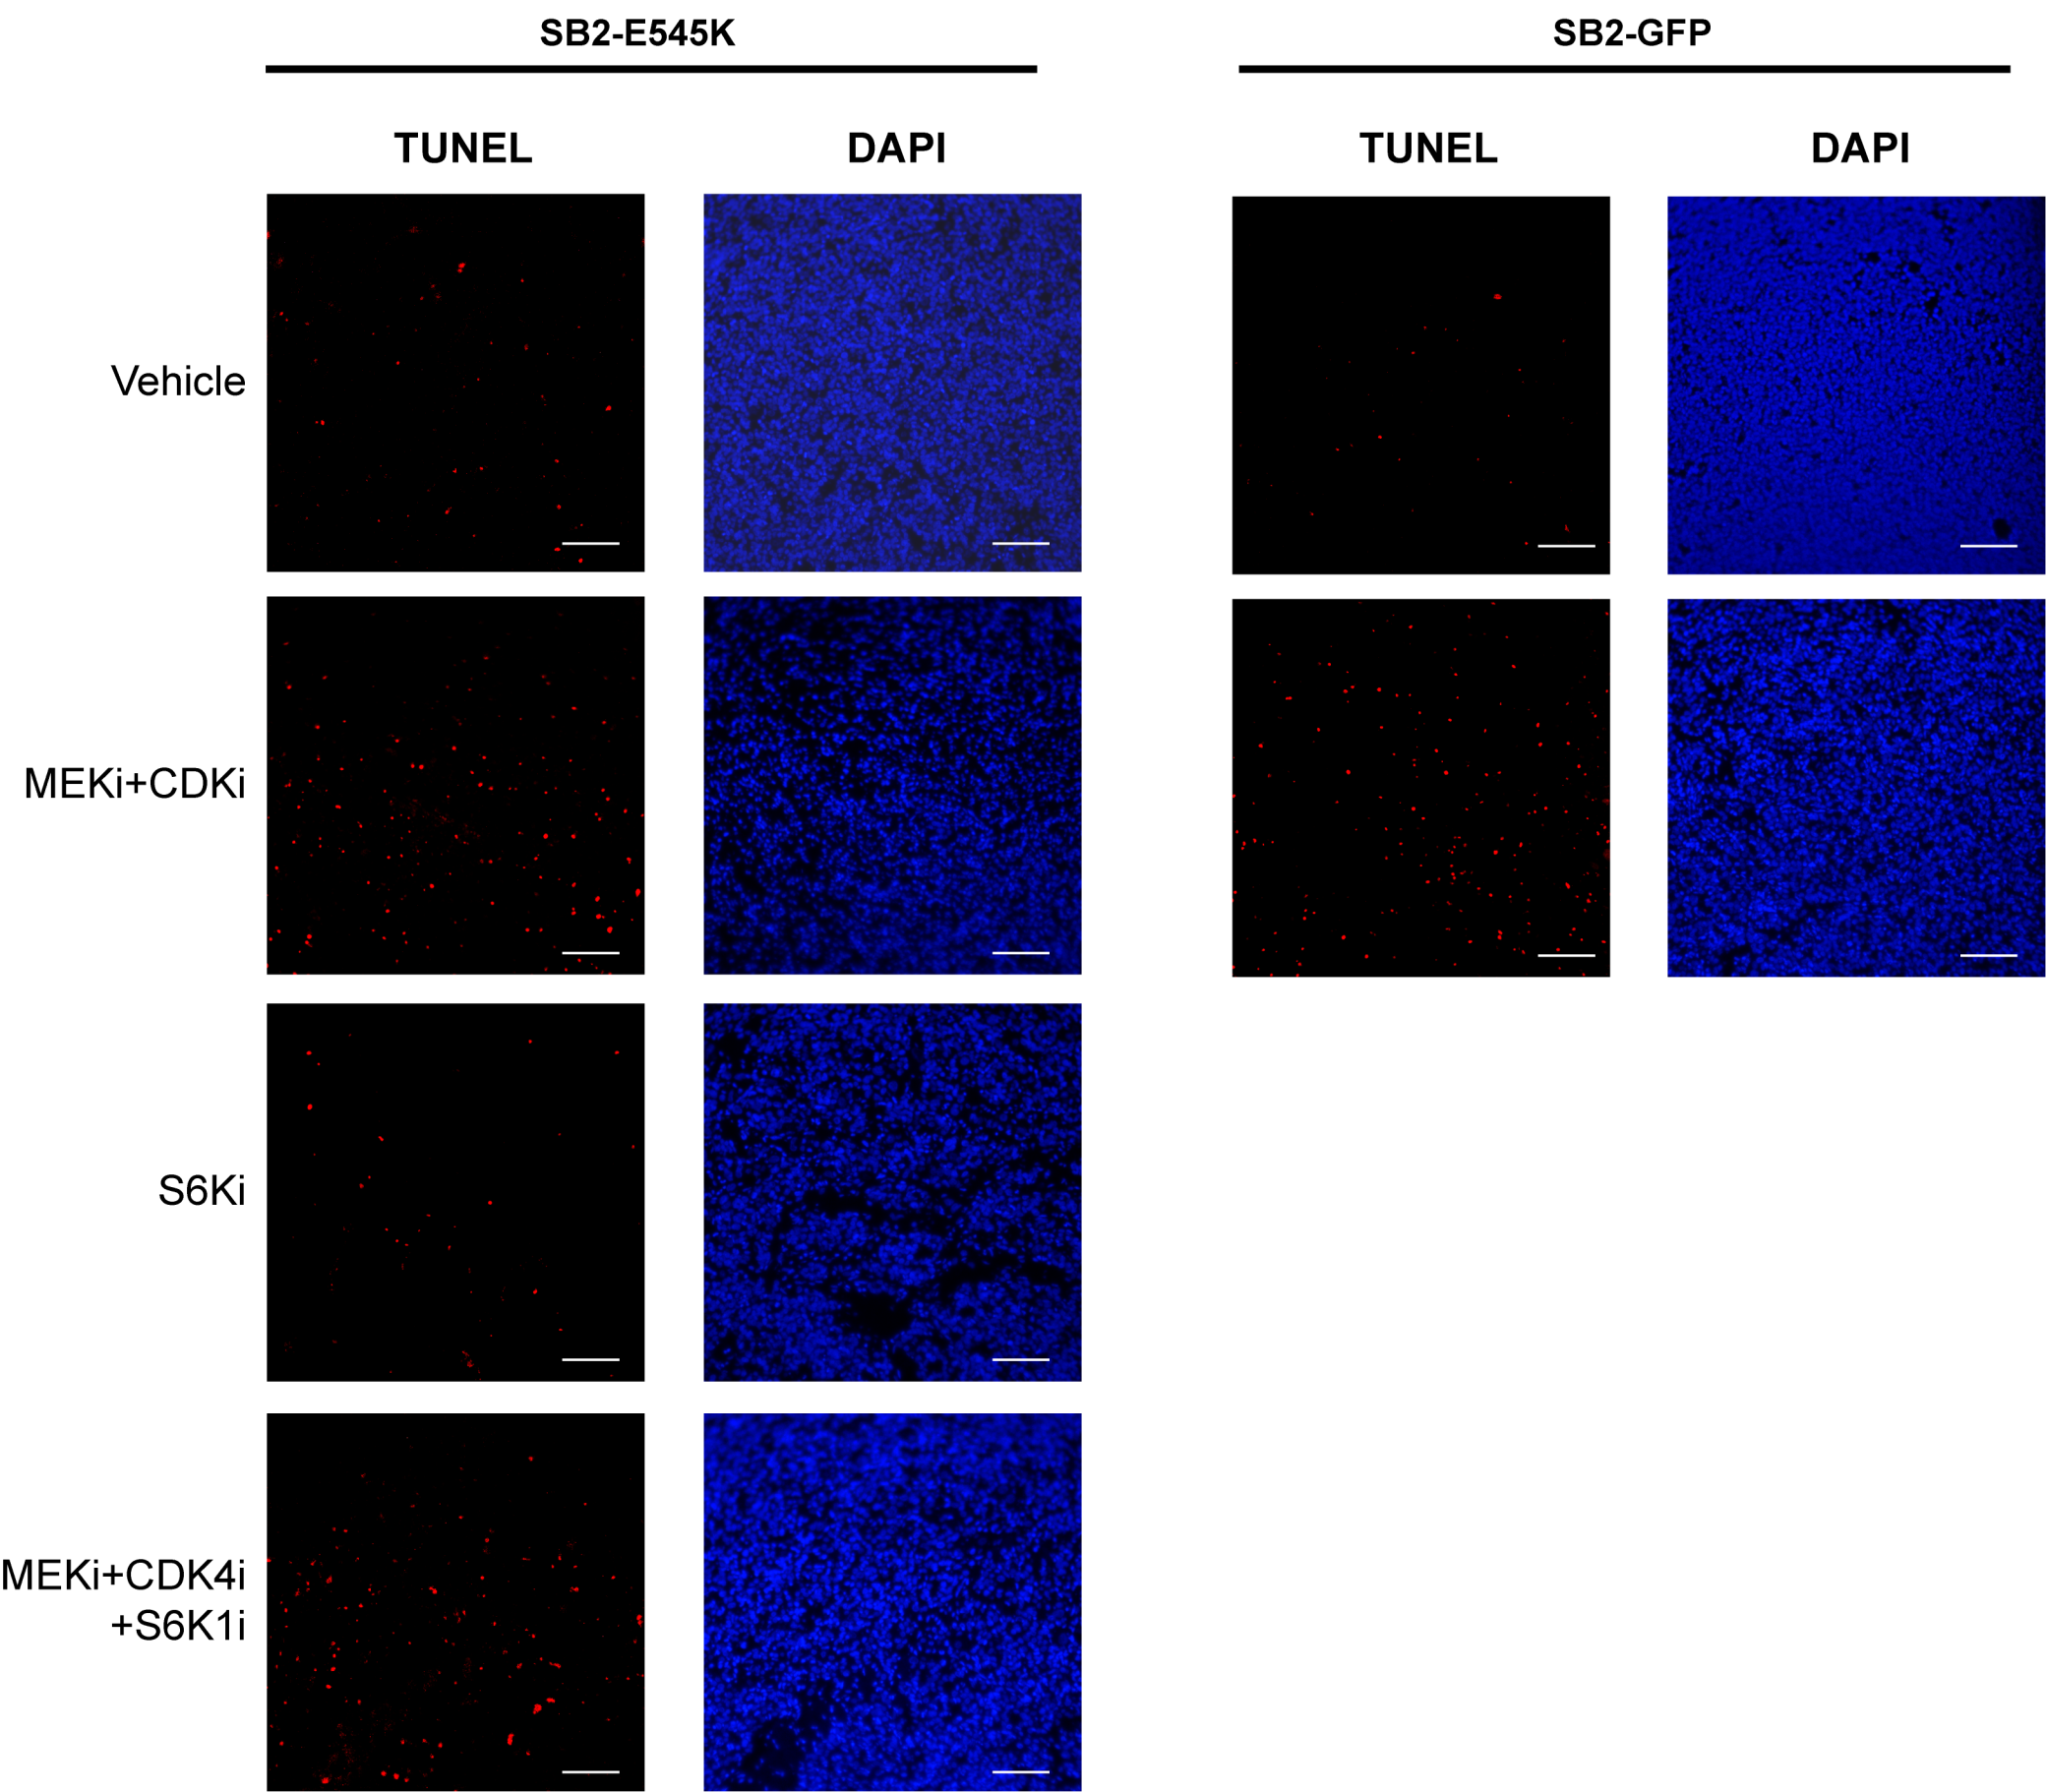

Supplement: NIHMS947513-supplement-3.pdf [file NIHMS947513-supplement-3.pdf]
